# Supplementary material
Source: PubMed Central journal article supplement (PMC4026016)

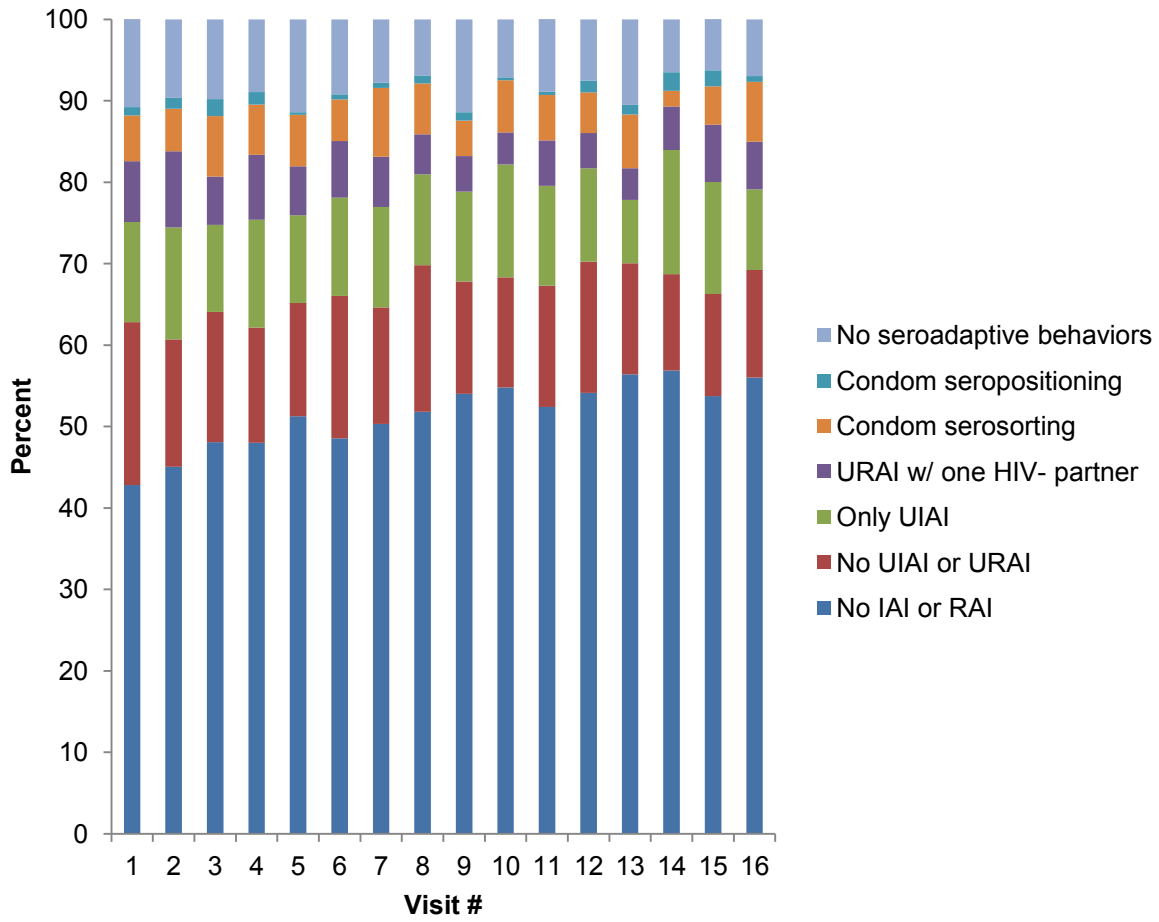

Supplement: NIHMS575851-supplement-1.pdf [file NIHMS575851-supplement-1.pdf]
